# Supplementary material
Source: MDPI journal article supplement (https://www.mdpi.com/1996-1073/16/14/5308)
Supplement: s1 [file s1]

Supplementary Materials

**Total Conductivity from EIS**

**A<sub>2</sub>Ce<sub>2</sub>O<sub>7</sub>/ZnO at 600 °C**

| Sample                                         | Ro    | Rct   | Rt    | Total Conductivity |
|------------------------------------------------|-------|-------|-------|--------------------|
| Nd <sub>2</sub> Ce <sub>2</sub> O <sub>7</sub> | 0.029 | 0.156 | 0.185 | 0.844594595        |
| Bi <sub>2</sub> Ce <sub>2</sub> O <sub>7</sub> | 0.184 | 0.305 | 0.489 | 0.319529652        |
| La <sub>2</sub> Ce <sub>2</sub> O <sub>7</sub> | 0.392 | 0.523 | 0.915 | 0.170765027        |

**A<sub>2</sub>Ce<sub>2</sub>O<sub>7</sub>/LNCZ at 600 °C**

| Sample                                         | Ro    | Rct   | Rt    | Total Conductivity |
|------------------------------------------------|-------|-------|-------|--------------------|
| Nd <sub>2</sub> Ce <sub>2</sub> O <sub>7</sub> | 0.003 | 0.139 | 0.142 | 1.100352113        |
| Bi <sub>2</sub> Ce <sub>2</sub> O <sub>7</sub> | 0.102 | 0.214 | 0.316 | 0.494462025        |
| La <sub>2</sub> Ce <sub>2</sub> O <sub>7</sub> | 0.312 | 0.441 | 0.753 | 0.20750332         |

**LNCZ/A<sub>2</sub>Ce<sub>2</sub>O<sub>7</sub>/LSFC at 600 °C**

| Sample                                         | Ro    | Rct   | Rt    | Total Conductivity |
|------------------------------------------------|-------|-------|-------|--------------------|
| Bi <sub>2</sub> Ce <sub>2</sub> O <sub>7</sub> | 0.013 | 0.147 | 0.16  | 0.9765625          |
| Nd <sub>2</sub> Ce <sub>2</sub> O <sub>7</sub> | 0.133 | 0.216 | 0.349 | 0.447707736        |
| La <sub>2</sub> Ce <sub>2</sub> O <sub>7</sub> | 0.373 | 0.504 | 0.877 | 0.20750332         |
